# Supplementary material
Source: PubMed Central journal article supplement (PMC1746945)
Supplement: thorax_59_2_94__2.pdf [file thorax_59_2_94__2.pdf]

**Table S1** Outcome comparisons for action points based on % predicted or personal

best PEF

| <b>Outcome</b>                | <b>% Predicted PEF</b>           | <b>No. of studies</b> | <b>Personal best PEF</b>         | <b>No. of studies</b> |
|-------------------------------|----------------------------------|-----------------------|----------------------------------|-----------------------|
| Hospitalisations*             | 0.46 (0.26 to 0.81) <sup>+</sup> | 4[18,23,24,27]        | 0.66 (0.48 to 0.91) <sup>+</sup> | 5[8,9,15,19,21]       |
| ER visits*                    | 0.87 (0.64 to 1.18)              | 5[18,22,23,24,27]     | 0.78 (0.64 to 0.95) <sup>+</sup> | 4[8,9,15,19]          |
| Unscheduled Dr visits*        | 0.44 (0.17 to 1.14)              | 2[18,23]              | 0.69 (0.56 to 0.85) <sup>+</sup> | 3[19,21,10-14]        |
| Days off work*                | 0.90 (0.65 to 1.26)              | 3[18,24,27]           | 0.70 (0.53 to 0.92) <sup>+</sup> | 2[19,21]              |
| Nocturnal asthma*             | 0.65 (0.38 to 1.11)              | 2[18,24]              | 1.0 (0.92 to 1.08)               | 1[19]                 |
| FEV <sub>1</sub> <sup>#</sup> | -0.02 (-0.55 to 0.50)            | 1[27]                 | 0.40 (0.06 to 0.73) <sup>+</sup> | 2[19,20]              |
| PEF <sup>#</sup>              | -0.01 (-0.31 to 0.29)            | 2[24,27]              | 0.56 (0.37 to 0.76) <sup>+</sup> | 3[15,19,20]           |

\*Relative risk (95% CI).

<sup>#</sup>Standardised mean difference (95% CI).<sup>+</sup> p<0.05.
