# Supplementary material
Source: PubMed Central journal article supplement (PMC1746945)
Supplement: thorax_59_2_94__4.pdf [file thorax_59_2_94__4.pdf]

**Table S3** Outcome comparisons for ‘traffic light’ configuration of action plans

| <b>Outcome</b>         | <b>Traffic light</b>             | <b>No. of studies</b> | <b>No traffic light</b>          | <b>No. of studies</b> |
|------------------------|----------------------------------|-----------------------|----------------------------------|-----------------------|
| Hospitalisations*      | 0.58 ( (0.17 to 1.92)            | 2[8,18]               | 0.58 (0.43 to 0.79) <sup>+</sup> | 6[8,15,19,21,23,27]   |
| ER visits*             | 0.93 (0.70 to 1.23)              | 3[8,18,22]            | 0.74 (0.60 to 0.92) <sup>+</sup> | 5[9,15,19,23,27]      |
| Unscheduled Dr visits* | 0.44 (0.25 to 0.80) <sup>+</sup> | 2[10-14,18]           | 0.72 (0.58 to 0.90) <sup>+</sup> | 3[19,21,23]           |
| Days off work*         | 0.92 (0.63 to 1.33)              | 1[18]                 | 0.74 (0.56 to 0.97) <sup>+</sup> | 3[19,21,27]           |
| Nocturnal asthma*      | 0.36 (0.16 to 0.81) <sup>+</sup> | 1[18]                 | 1.0 (0.92 to 1.08)               | 1[19]                 |

\*Relative risk (95% CI).

<sup>+</sup> p<0.05.
