# Supplementary material
Source: PubMed Central journal article supplement (PMC1746945)
Supplement: thorax_59_2_94__5.pdf [file thorax_59_2_94__5.pdf]

**Table S4** Outcome comparisons for corticosteroids

| <b>Outcome</b>             | <b>ICS &amp; OCS</b>                | <b>No. of studies</b>       | <b>OCS only</b>                  | <b>No. of studies</b> |
|----------------------------|-------------------------------------|-----------------------------|----------------------------------|-----------------------|
| Hospitalisations*          | 0.59 (0.44 to 0.78) <sup>+</sup>    | 9[8,9,15,18,19,21,23,24,27] | 0.43 (0.08 to 2.18)              | 1[28]                 |
| ER visits*                 | 0.81 (0.69 to 0.96) <sup>+</sup>    | 9[8,9,15,18,19,22,23,24,27] | 0.67 (0.46 to 0.97) <sup>+</sup> | 1[28]                 |
| Days off work <sup>#</sup> | -0.35 (-0.49 to -0.21) <sup>+</sup> | 6[8,9,10-14,18,19,21]       | -0.13 (-0.34 to 0.08)            | 3[17,26,28]           |
| Nocturnal asthma*          | 0.84 (0.67 to 1.05)                 | 3[18,19,24]                 | 0.30 (0.16 to 0.55) <sup>+</sup> | 1[28]                 |
| FEV1 <sup>#</sup>          | 0.27 (-0.01 to 0.56)                | 3[19,20,27]                 | 0.03 (-0.12 to 0.18)             | 2[16,28]              |
| PEF <sup>#</sup>           | 0.39 (0.23 to 0.56) <sup>+</sup>    | 5[15,19,20,24,27]           | -0.02 (-0.17 to 0.13)            | 2[16,28]              |

\*Relative risk (95% CI).

<sup>#</sup>Standardised mean difference (95% CI).

ICS: inhaled corticosteroid.

OCS: oral corticosteroid.

<sup>+</sup> p<0.05.
